# Supplementary material
Source: Springer Nature journal article supplement (https://www.springermedizin.de/resource/supplementary/12985_2013_2378_MOESM2_ESM.pdf/9606930)

**A**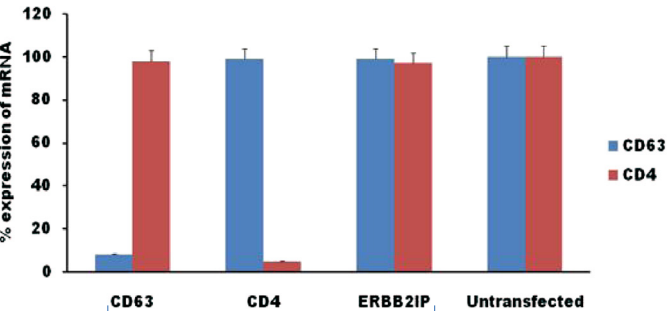**B**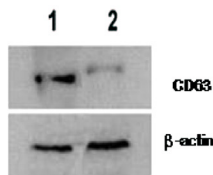**C**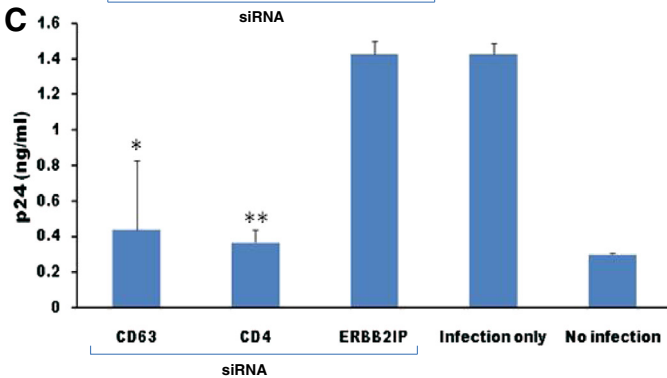

Supplement: MOESM2 [file 9606930]
